# Supplementary material for: Patient reported side-effects of prednisone and methotrexate in a real-world sarcoidosis population
Source: PubMed Central journal article supplement (PMC8477709; doi:10.1177/14799731211031935), 2021-09-26
Supplement: sj-pdf-1-crd-10.1177_14799731211031935.pdf [file sj-pdf-1-crd-10.1177_14799731211031935.pdf]

Supplementary file 1: SURVEY ABOUT MEDICATION USE – SARCOIDOSIS PATIENTDAY

---

Age: ..... years                      Gender: male/female

When was the diagnosis sarcoidosis confirmed? (Example: March 2014)

.....

Are you currently using medication for sarcoidosis? Yes/No

If yes, what medication do you use and in what dosage?

.....

For how long have you been using the above mentioned medication?

.....

Have you experienced any side-effects of your sarcoidosis medication? Yes/No

| Side-effect: | Medication? | Bothersomeness of side-effects<br>on a scale from 0-10?<br><i>Not bothersome = 0, very bothersome = 10</i> |
|--------------|-------------|------------------------------------------------------------------------------------------------------------|
|--------------|-------------|------------------------------------------------------------------------------------------------------------|

|       |       |       |
|-------|-------|-------|
| ..... | ..... | ..... |
|-------|-------|-------|

|       |       |       |
|-------|-------|-------|
| ..... | ..... | ..... |
|-------|-------|-------|

|       |       |       |
|-------|-------|-------|
| ..... | ..... | ..... |
|-------|-------|-------|

|       |       |       |
|-------|-------|-------|
| ..... | ..... | ..... |
|-------|-------|-------|

**Please fill in the next three questions if you have used prednisone in the past**

Did you experience side-effects of prednisone? If yes, please describe the most important side-effects.

.....

Why did you stop taking prednisone? (example: side-effects, prednisone was not effective)

.....

How long did you use prednisone?

.....

**Please fill in the next three questions if you have used methotrexate in the past**

Did you experience side-effects of methotrexate? If yes, please describe the most important side-effects.

.....

Why did you stop taking methotrexate? (example: side-effects, methotrexate was not effective)

.....

How long did you use methotrexate?

.....
